1 **Exceptional Solvent Tolerance in *Yarrowia lipolytica* Is Enhanced by Sterols**

2

3 Caleb Walker, Seunghyun Ryu, Cong T. Trinh\*

4 Department of Chemical and Biomolecular Engineering, University of Tennessee, TN 37996

5

6 \*Corresponding author. Email: [ctrinh@utk.edu](mailto:ctrinh@utk.edu). Tel: 865-974-8121

## 7 **Abstract**

8 Microbial biocatalysis in organic solvents such as ionic liquids (ILs) is attractive for making fuels  
9 and chemicals from complex substrates including lignocellulosic biomass. However, low IL  
10 concentrations of 0.5–1.0 % (v/v) can drastically inhibit microbial activity. In this study, we  
11 engineered an exceptionally robust oleaginous yeast *Yarrowia lipolytica*, YICW001, by adaptive  
12 laboratory evolution (ALE). The mutant YIWC001 shows robust growth in up to 18% (v/v) 1-  
13 ethyl-3-methylimidazolium acetate ([EMIM][OAc]), which makes it the most IL-tolerant  
14 microorganism published to our knowledge. Remarkably, YICW001 exhibits broad tolerance in  
15 most commonly used hydrophilic ILs beyond [EMIM][OAc]. Scanning electron microscopy  
16 revealed that ILs significantly damage cell wall and/or membrane of wildtype *Y. lipolytica* with  
17 observed cavities, dents, and wrinkles while YICW001 maintains healthy morphology even in high  
18 concentrations of ILs up to 18% (v/v). By performing comprehensive metabolomics, lipidomics,  
19 and transcriptomics to elucidate this unique phenotype, we discovered that both wildtype *Y.*  
20 *lipolytica* and YICW001 reconfigured membrane composition (e.g., glycerophospholipids and  
21 sterols) and cell wall structure (e.g., chitin) under IL-stressful environments. By probing the steroid  
22 pathway at transcriptomic, enzymatic, and metabolic levels, we validated that sterols (i.e.,  
23 ergosterol) are a key component of the cell membrane that enables *Y. lipolytica* to resist IL-  
24 responsive membrane damage and hence tolerate high IL concentrations. This study provides a  
25 better understanding of exceptional robustness of *Y. lipolytica* that can be potentially harnessed as  
26 a microbial manufacturing platform for production of fuels and chemicals in organic solvents.

27

28 **Keywords:** *Yarrowia lipolytica*; ionic liquid; adaptive laboratory evolution; stress responsive  
29 metabolism; lipidomics; metabolomics; glycerophospholipids; sterols

## 30 **Significance**

31 Robustness is an important production phenotype for any industrial microbial catalyst to acquire  
32 but it is complex and difficult to engineer. Through adaptive laboratory evolution, in combination  
33 with comprehensive omics analysis, we shed light on the underlying mechanism of how *Y.*  
34 *lipolytica* restructures its membrane to tolerate high levels (up to 18% v/v) of ILs, which makes  
35 our evolved strain the most IL-tolerant microorganism reported to date. Specifically, we  
36 discovered that sterols play a key role for enhancing exceptional IL tolerance in *Y. lipolytica*.  
37 Overall, this study provides fundamental understanding and engineering strategy for exceptional  
38 robustness of oleaginous yeasts to improve growth and novel biotransformation in inhibitory  
39 organic solvents.

40

## 41 **Introduction**

42 Robustness is an important phenotype for any industrial microbe to acquire for biosynthesis of  
43 desirable molecules (1-3). Recently, microbial biocatalysis in green organic solvents such as ionic  
44 liquids (ILs) has become attractive to produce biofuels (4, 5) and high-value bioproducts (6-8).  
45 One key advantage is that ILs can effectively process complex and recalcitrant substrates such as  
46 lignocellulosic biomass for microbial fermentation (9-13). Further, these ILs can function as  
47 extractants for *in situ* separation of desirable molecules (14-18). Thus, it is highly desirable to  
48 harness novel microbes for biocatalysis in organic solvents.

49 To perform novel biotransformation in ILs, microbes need to be robust to tolerate high  
50 concentrations of solvents (19, 20). These solvents are inhibitory because they severely disrupt  
51 cell membranes and intracellular processes (21-23). For applications such as simultaneous  
52 saccharification and fermentation of IL-pretreated lignocellulosic biomass, microbes that are  
53 active in high IL-containing media are desirable because expensive IL washing and recycling steps  
54 prior to fermentation are not needed (7, 24). Unfortunately, most industrially-relevant platform  
55 organisms, *Escherichia coli* and *Saccharomyces cerevisiae*, are severely inhibited in IL-containing  
56 media even at low concentrations, for instance, 1% (v/v) [EMIM][OAc] (25, 26).

57 To overcome IL toxicity, various targeted and evolutionary engineering strategies have  
58 been performed. For instance, an *E. coli* strain was engineered to produce desirable chemicals from  
59 IL-pretreated biomass in the presence of 100 mM (< 2% v/v) [EMIM][OAc] by mutating the  
60 endogenous transcriptional regulator RcdA (P7Q) to de-repress expression of the inner membrane  
61 pump YbjJ (27) or overexpressing a heterologous IL-specific efflux pump, EliA, isolated from  
62 *Enterobacter lignolyticus* (28, 29). Likewise, adaptive laboratory evolution (ALE) was conducted  
63 to generate an *E. coli* mutant with robust growth in 500 mM (8.3 % (v/v)) [EMIM][OAc] (30). By

64 deleting a highly IL-responsive, mitochondrial serine/threonine kinase gene *ptk2* (which activates  
65 a plasma-membrane proton efflux pump Pma1), an engineered *S. cerevisiae* strain became capable  
66 of tolerating > 2% (v/v) [EMIM][Cl] (31). Even though the above engineering strategies resulted  
67 in enhanced IL-tolerant phenotypes, the engineered strains are not tolerant enough to robustly grow  
68 in in 10 % (v/v) ILs unlike *Y. lipolytica*. This highlights the complexity of IL-tolerant phenotypes  
69 and the limited understanding of IL-tolerant mechanisms.

70 Synergistically, exploring microbial and genetic diversity can potentially discover novel  
71 genotypes conferring novel IL tolerance that typically does not exist in the current platform  
72 organisms. Bioprospecting the tropical rainforest soil resulted in isolation of a novel *Enterobacter*  
73 *lignolyticus* that could survive in 0.5 M (6.6 % (v/v)) [EMIM][Cl] (29). Likewise, screening  
74 microbial diversity from a collection of 168 fungal yeasts identified 13 robust strains that can  
75 tolerate up to 5% (v/v) [EMIM][OAc], including *Clavispora*, *Debaryomyces*, *Galactomyces*,  
76 *Hyphopichia*, *Kazachstania*, *Meyerozyma*, *Naumovozya*, *Wickerhamomyces*, *Yarrowia*, and  
77 *Zygoascus* genera (20). Among the non-conventional yeasts, *Y. lipolytica* is attractive for  
78 fundamental study and industrial application due to its oleaginous nature (32, 33) and robustness  
79 in extreme environments (20, 34-36). Remarkably, wildtype *Y. lipolytica* (ATCC MYA-2613)  
80 exhibited robust growth in media containing at least 10% (v/v) [EMIM][OAc] while producing  
81 92% maximum theoretical yield of alpha-ketoglutarate from IL-pretreated cellulose (7). Currently,  
82 mechanisms of IL toxicity and superior tolerance in microorganisms are not completely elucidated  
83 (37). For instance, since prokaryotes and eukaryotes have different membrane structures, it is  
84 unclear of how their membranes are reconfigured to resist IL interference.

85 Given the endogenous robustness of *Y. lipolytica*, the goal of this study is to illuminate the  
86 underlying mechanisms for IL toxicity and exceptional tolerance of the wildtype strain and evolved

87 mutant generated by ALE. Particularly, we aim to elucidate how *Y. lipolytica* restructures its  
88 membrane to resist IL disruption and modulates sterol levels to improve exceptional IL tolerance.

89

## 90 **Results**

### 91 **Generate robust *Y. lipolytica* mutants via ALE as a basis for elucidating IL-tolerant** 92 **mechanism**

93 *Y. lipolytica* has a novel endogenous metabolism conferring exceptional IL tolerance.

94 Since wildtype *Y. lipolytica* can grow in at least 10% (v/v) [EMIM][OAc] (7), we hypothesize that  
95 it has a novel endogenous metabolism conferring exceptional IL robustness. To test this, we  
96 performed ALE to generate *Y. lipolytica* mutants with enhanced tolerance to high concentrations  
97 of the benchmark IL, [EMIM][OAc] (Fig. 1, Step1). First, wildtype *Y. lipolytica* was grown in a  
98 medium containing 5% (v/v) [EMIM][OAc] and transferred into a medium containing  
99 progressively increased concentrations of [EMIM][OAc], 8% and 10% (v/v). Remarkably, *Y.*  
100 *lipolytica* was able to grow in 5%, 8%, and 10% (v/v) [EMIM][OAc] with specific growth rates  
101 of  $0.063 \pm 0.005$  1/h,  $0.056 \pm 0.033$  1/h and  $0.060 \pm 0.004$  1/h, respectively, without any significant  
102 growth inhibition (Fig. 2A). When *Y. lipolytica* was transferred into a medium containing 12%  
103 (v/v) [EMIM][OAc], it initially exhibited growth inhibition with significantly reduced specific  
104 growth rate of  $0.034 \pm 0.001$  1/h. However, after 16 generations in 12% (v/v) [EMIM][OAc], the  
105 specific growth rate was improved up to  $0.080 \pm 0.006$  1/h and maintained for another 22  
106 generations. Next, we increased the concentration of [EMIM][OAc] to 15% (v/v) and continued  
107 ALE. The first transfer from 12% (v/v) to 15% (v/v) reduced the specific growth rate by ~62% but  
108 cells recovered within 5 generations ( $0.078 \pm 0.014$  1/h) and the growth was maintained for an  
109 additional 23 generations. We further increased the concentration of [EMIM][OAc] to 18% (v/v)

110 and continued serial transfers for another 106 generations. At the end of ALE (200 generations),  
111 we isolated the top performing *Y. lipolytica* mutant, YICW001, growing in up to 18% (v/v)  
112 [EMIM][OAc] with a specific growth rate of  $0.055 \pm 0.006$  1/h (Fig. 1, Step 2).

113 ***Exceptional IL-tolerant phenotype of the evolved mutant YICW001 is stable.*** To use  
114 YICW001 for downstream characterization, we subjected it to irreversibility and stability tests  
115 (Fig. 1, Step 3). For irreversibility test, three biological replicates of wildtype and YICW001  
116 strains were grown in medium containing 8% (v/v) [EMIM][OAc] to lessen abrupt osmotic shock  
117 driven by IL. Mid-exponentially growing cells were then transferred into the medium containing  
118 glucose and 18% (v/v) [EMIM][OAc], and the cell growth was investigated. While growth of  
119 wildtype *Y. lipolytica* was completely inhibited, YICW001 was able to grow with a specific growth  
120 rate of  $0.059 \pm 0.001$  1/h (Fig. 2B), comparable to that measured from ALE in 18% (v/v)  
121 [EMIM][OAc]. These results confirmed that the improved IL-tolerance for YICW001 is  
122 irreversible.

123 Further, we investigated stability of YICW001 by reviving the frozen glycerol stock in the  
124 liquid medium containing glucose and [EMIM][OAc] (Fig. 1, Step 3). Like the irreversibility test,  
125 we tested cell growth of three biological replicates of YICW001 in 18% (v/v) [EMIM][OAc] using  
126 glucose as a carbon source. The measured specific growth rate was similar to that from ALE and  
127 the irreversibility test (data not shown), proving that YICW001 is a stable strain.

128 ***YICW001 exhibits broad tolerance to a wide range of hydrophilic ILs.*** To test whether  
129 the IL-evolved strain YICW001 exhibits broad IL-tolerant phenotypes, we investigated the  
130 following hydrophilic ILs: 1-ethyl-3-methylimidazolium acetate ([EMIM][OAc]), 1-ethyl-3-  
131 methylimidazolium chloride ([EMIM][Cl]), 1-ethyl-3-methylimidazolium bromide  
132 ([EMIM][Br]), 1-allyl-3-methylimidazolium chloride ([AMIM][Cl]), 1-butyl-3-

133 methylimidazolium acetate ([BMIM][OAc]), 1-butyl-3-methylimidazolium chloride  
134 ([BMIM][Cl]), and 1-butyl-3-methylimidazolium bromide ([BMIM][Br]). We selected these ILs  
135 for testing because they can effectively solubilize various types of recalcitrant lignocellulosic  
136 biomass and are known to be very inhibitory to microbial growth (38, 39). Since wildtype growth  
137 was inhibited in 10% (v/v) and lethal in 18% (v/v) [EMIM][OAc] (Fig. 2C), we characterized these  
138 strains in two different concentrations of ILs, 0.6 M and 1.09 M (equivalent to 10% and 18% (v/v)  
139 of [EMIM][OAc], respectively).

140 Growth characterization in 0.6 M ILs shows that YICW001 outperformed wildtype *Y.*  
141 *lipolytica* for all ILs except [EMIM][Cl], for which similar specific growth rates were observed  
142 (Fig. 2D). Remarkably, YICW001 growth was not affected by all tested ILs regardless of  
143 imidazolium alkyl chain length and conjoined anion, excluding [BMIM][OAc], which at 0.6 M  
144 was lethal to both wildtype and YICW001 (Fig. 2D). In 1.09 M ILs, wildtype *Y. lipolytica*  
145 exhibited substantial growth inhibition in [EMIM][Cl] and [EMIM][Br] and no growth in  
146 [AMIM][Cl], [BMIM][Cl], [EMIM][OAc], [BMIM][Br], and [BMIM][OAc] (Fig. 2E).  
147 Strikingly, the evolved strain YICW001 displayed robustness in all ILs except [BMIM][OAc]  
148 confirming broad tolerance to ILs (Fig. 2E).

149 Inhibition of YICW001 growth was detected in the following order: [BMIM][OAc] >>  
150 [BMIM][Br]  $\approx$  [BMIM][Cl]  $\approx$  [EMIM][OAc] > [AMIM][Cl] > [EMIM][Br]  $\approx$  [EMIM][Cl].  
151 While 0.6 M [BMIM][OAc] entirely inactivated growth of both wildtype and YICW001, the  
152 mutant tolerated 0.3 M [BMIM][OAc] with a specific growth rate of  $0.07 \pm 0.02$  1/h which  
153 remained lethal to wildtype (SI Appendix, Fig. S1).

154 Overall, we demonstrated that *Y. lipolytica* possesses novel endogenous metabolism  
155 conferring high IL tolerance by generating a novel, exceptionally robust *Y. lipolytica* mutant via



156 ALE. The evolved strain YICW001 is stable and exhibits broad tolerance towards the hydrophilic  
157 ILs in this study. This significant result provides a strong basis for elucidating the underlying  
158 mechanism of solvent toxicity in *Y. lipolytica*.

### 159 **Elucidate IL-responsive physiology and metabolism in *Y. lipolytica* strains**

160 *Cell membrane and morphology of the evolved mutant resist IL interference.* Since ILs  
161 are known to disrupt the cell membrane (40-42), we hypothesize that the mutant YICW001 might  
162 have adapted its membrane structure to cope with inhibitory ILs. To test this, we used scanning  
163 electron microscopy (SEM) to examine cell membranes and morphologies of both the wildtype  
164 and mutant responsive to 0% and 18% (v/v) [EMIM][OAc], 0.3M [BMIM][OAc], and 0.6M  
165 [BMIM][OAc].

166 As a positive control, we observed healthy morphologies for both the wildtype and mutant  
167 in no-IL media (Fig. 3A, 3B). However, when exposed to 18% (v/v) [EMIM][OAc], the wildtype  
168 developed cavities, dents, and wrinkles along the cell surface, clearly demonstrating that cell  
169 membrane and/or cell wall components were severely damaged by the IL (Fig. 3C). This  
170 phenotype is consistent with the complete growth inhibition of the wildtype observed at this high  
171 IL concentration (Fig. 2B, 2C). In contrast, the evolved strain YICW001 displayed barely any  
172 signs of membrane damage in 18% (v/v) [EMIM][OAc] (Fig. 3D).

173 Likewise, when being exposed to a more toxic IL, [BMIM][OAc], the wildtype exhibited  
174 significant morphology deconstruction in both 0.3M and 0.6M [BMIM][OAc] (Fig. 3E, 3G).  
175 Strikingly, YICW001 displayed no significant morphological defects (Fig. 3F, 3H) although  
176 growth was marginally inhibited in 0.3M and lethal in 0.6M [BMIM][OAc] (SI Appendix, Fig. S1  
177 and Fig. 2D).

178           ***Intracellular metabolism of *Y. lipolytica* is perturbed in response to IL exposure.*** To  
179 demonstrate that intracellular metabolism of *Y. lipolytica* is also perturbed in IL, we performed  
180 untargeted metabolomics and lipidomics for both the wildtype and YICW001 growing in media  
181 containing 0% and 8% (v/v) [EMIM][OAc]. Our results identified a total of 37 and 40 significantly  
182 perturbed pathways in wildtype and YICW001, respectively, growing in 8% (v/v) [EMIM][OAc]  
183 as compared to the wildtype growing in no IL (Fig. 3I and SI Appendix, Table S1). Among these  
184 pathways, 29 were found perturbed in both wildtype and YICW001. These pathways are mostly  
185 comprised of amino acid synthesis/degradation, nucleosides and nucleotides  
186 synthesis/degradation, but also contain vitamins synthesis (coenzyme A, thiamine, folate, and  
187 biotin biosynthesis etc.), carbohydrates biosynthesis/degradation (GDP-mannose biosynthesis,  
188 gluconeogenesis, galactose degradation, etc.), respiration (TCA cycle, glyoxylate cycle, etc.),  
189 sterols biosynthesis, and some of the central metabolic pathways responsible for generating  
190 precursor metabolites and energy (glycolysis, pentose phosphate pathway, etc.).

191           Furthermore, we found that YICW001 had a total of 19 perturbed metabolic processes in  
192 media without IL in comparison to the wildtype without IL (Fig. 3I and SI Appendix, Table S1).  
193 Notably, 15 of these pathways were also perturbed in YICW001 and wildtype growing in 8% (v/v)  
194 [EMIM][OAc] mostly enriched for amino acid biosynthesis/degradation but also included sterol  
195 biosynthesis. Overall, we identified significant perturbation of intracellular metabolism for both  
196 strains subjected to IL. While the bulk of these pathways are enriched for central carbon  
197 metabolism, our untargeted metabolomics and lipidomics identified sterols biosynthesis as the  
198 only lipid pathway significantly perturbed among all three biological conditions (wildtype 8%,  
199 YICW001 8%, YICW001 0%) in comparison to the wildtype without IL (Fig. 3I).

200

201           ***Remodeling of cell membrane enhanced IL-tolerance in Y. lipolytica.*** The outer-surface  
202 of the eukaryotic yeast is a multifaceted, permeable barrier composed of a plasma membrane (i.e.,  
203 glycerophospholipids, sterols, sphingolipids) and cell wall (i.e., chitin, glucan, mannoproteins) that  
204 together, allow the cell to adapt to a variety of environmental conditions to maintain cellular  
205 homeostasis (43-46). Based on SEM images, untargeted metabolomics, and potential mechanisms  
206 of IL-toxicity (21, 47-50), we hypothesized that remodeling of cellular membrane and/or cell wall  
207 is one key IL stress-responsive process in *Y. lipolytica*. We aimed to identify critical membrane  
208 and cell wall components conferring exceptional IL-tolerance of both wildtype and YICW001  
209 strains by investigating IL-responsive glycerophospholipid, fatty acid, sterol, and chitin  
210 metabolism in benchmark IL, [EMIM][OAc].

211           ***Y. lipolytica reduced chitin in the presence of ILs.*** Chitin is one of the most insoluble  
212 biopolymers, even for ILs (47, 51). In *S. cerevisiae*, it has been reported that metabolism of chitin,  
213 a cell wall component known to influence membrane rigidity and elasticity, is increased upon cell  
214 wall integrity stresses (52). Since *Y. lipolytica* contains a relatively high content of chitin relative  
215 to other yeasts (e.g., ~10-15% *Y. lipolytica*; ~1-3% *S. cerevisiae*), we investigated how its  
216 membrane chitin is responsive to IL exposure. Counter-intuitively, we observed a ~2-fold  
217 reduction in chitin content for both strains upon IL-exposure (SI Appendix, Fig. S2). Of note, we  
218 were unable to detect any statistically significant differences in chitin levels between the wildtype  
219 and YICW001 strains as they behaved similarly in 0% and 8% [EMIM][OAc]. While chitin may  
220 contribute to native *Y. lipolytica* IL-robustness, our results suggest chitin is not responsible for the  
221 enhanced IL-tolerance of YICW001.

222           ***Y. lipolytica modulated glycerophospholipid composition in the presence of ILs.*** Upon IL  
223 exposure, the backbone and headgroups of the *glycerophospholipids* are expected to interact with

224 both cations and anions of ILs. To understand IL toxicity and tolerance, we next investigated IL-  
225 responsive glycerophospholipid metabolism by performing targeted lipidomics on individual  
226 headgroup species (i.e., phosphatidylcholine, PC; phosphatidylinositol, PI; phosphatidic acid, PA;  
227 phosphatidyl glycerol, PG; phosphatidylserine, PS; phosphatidylethanolamine, PE; and  
228 cardiolipins, CL) for both strains in 0% and 8% (v/v) [EMIM][OAc]. In no IL media, we found  
229 that YICW001 contained a larger amount of each glycerophospholipid species than the wildtype  
230 (Fig. 4 A-G). In 8% (v/v) [EMIM][OAc], most components of glycerophospholipids, including  
231 PC, PI, PA, PG, and CL, were upregulated in both strains, except that PE and PS exhibited different  
232 trends. The PE content of both strains remained unchanged (relative to wildtype 0%) while the PS  
233 content increased (Fig. 4E, 4F). Additionally, the mutant in media without IL contained  
234 statistically greater basal amounts of PE and PS species ( $p \leq 0.01$ ) than the wildtype.

235 Overall, we found IL-responsive, upregulated glycerophospholipid production of all  
236 headgroup species except PE. Interestingly, we also observed greater basal glycerophospholipid  
237 content in YICW001 over the wildtype in 0% IL. These findings of membrane restructuring likely  
238 contribute to IL-toxicity resistance in *Y. lipolytica*.

239 ***ILs modulated the fatty acid composition of Y. lipolytica.*** Since fatty acids can modulate  
240 membrane fluidity (53, 54), we next analyzed the effect of ILs on the fatty acid profiles of wildtype  
241 and YICW001 strains. The most striking differences were observed for C16:1 and C18:1 fatty  
242 acid moieties (Fig. 4H). We found that both strains exposed to IL induced production of C16:1 (7  
243 mol%,  $p < 0.01$ ) fatty acids unlike the wildtype strain without IL, which produced none. In  
244 contrast, the wildtype without IL contained mostly C18:1 fatty acids (49 mol%) while all other  
245 biological conditions shifted to the di-unsaturated C18:2 moiety (29-36 mol%,  $p < 0.02$ ).  
246 Interestingly, YICW001 in media without IL behaved similarly to IL-exposed strains, with

247 significant increases in C16 and C18:2 production. We did not observe a statistically significant  
248 difference between total saturated and unsaturated fatty acid moieties in both conditions. Taken  
249 together, IL-exposed cells (and YICW001 0%) produced C16:1 fatty acids (non-existent in  
250 wildtype 0%) with statistically significant larger ratios of C16:C18 and (C18:2):(C18:1) moieties  
251 in comparison to the wildtype without IL. Shorter chain lengths with higher degrees of  
252 unsaturation in fatty acid moieties of the cell membrane are likely expected to increase membrane  
253 fluidity (46). These results indicate that fatty acid metabolism is IL-modulated in *Y. lipolytica* and  
254 altered in YICW001, even without IL.

255 ***YICW001 increased sterols in the presence of ILs.*** We next investigated the functional  
256 role of sterols for IL tolerance in *Y. lipolytica* because i) the sterol biosynthesis pathway was  
257 perturbed in untargeted omics analysis, ii) sterols (e.g., cholesterol) can impede cation-insertion  
258 into the membrane (48), and iii) sterols greatly influence membrane fluidity (55, 56). In IL, we  
259 observed ~2 fold increase ( $p = 0.013$ ) in ergosterol content of YICW001 over the wildtype strain  
260 (Fig. 5D). Counter-intuitively, we found the largest ergosterol concentrations in both strains  
261 without IL. We were unable to identify any other sterol pathway intermediates (e.g., squalene,  
262 lanosterol, etc.), in agreement with literature concluding ergosterol as the dominant sterol in yeast  
263 (57). These results imply that IL affects sterol biosynthesis, and unlike the wildtype, YICW001  
264 adapted by enhancing membrane sterols in response to IL exposure.

265 **Sterol biosynthesis is one key IL-responsive process to improve IL-tolerance in *Y. lipolytica***  
266 We hypothesized that ergosterol content is a critical component of the membrane contributing to  
267 the enhanced IL-tolerance of YICW001 since we observed a greater ergosterol content in  
268 YICW001 than the wildtype upon exposure to IL (Fig. 5D). To validate the key role of sterols, we

269 investigated genetic and enzymatic details of how *Y. lipolytica* modulates the sterol pathway in  
270 response to IL.

271 We first characterized the mRNA expression levels of 14 genes in the steroid biosynthesis  
272 pathway of mid-exponentially growing wildtype and YICW001 cells cultured in 0% and 8%  
273 [EMIM][OAc] (Fig. 5A). We found that 10 of the 14 steroid pathway genes were upregulated > 2  
274 fold in IL-exposed YICW001 as compared to the wildtype in 0% IL (Fig. 5B). Significantly, six  
275 of these genes, including Ster5 (YALI0B23298g), Ster6 (YALI0F11297g), Ster8  
276 (YALI0B17644g), Ster10-1 (YALI0E32065g), Ster10-2 (YALI0B17204g), and Ster11  
277 (YALI0D20878g), were upregulated > 4 fold in IL-exposed YICW001 over the wildtype in 0%  
278 IL. As for the wildtype in 8% IL, we found only 1 of the 14 steroid pathway genes, Ster10-2  
279 (YALI0B17204g), significantly upregulated against the wildtype without IL. Without IL, the  
280 steroid genes in YICW001 were relatively constant or marginally downregulated in comparison to  
281 the wildtype.

282 To confirm the contribution of sterols in IL-tolerance at the enzymatic level, we next  
283 treated the wildtype and YICW001 strains with fluconazole, a commonly used anti-fungal drug  
284 that inhibits cytochrome P450 enzyme 14 $\alpha$ -demethylase (Ster4, Fig. 5A) critical for sterol  
285 biosynthesis (58). We characterized growth of the wildtype and YICW001 in media containing  
286 either 0% or 8% (v/v) [EMIM][OAc] with incremental concentrations of fluconazole (Fig. 5C).  
287 We expected that fluconazole inhibits sterol biosynthesis and hence incurs the adverse effect of  
288 IL-tolerance, specifically to a greater extent in the wildtype than in YICW001. In media containing  
289 no IL, we found that fluconazole inhibited growth for both the wildtype and YICW001 (IC<sub>50</sub> = 25  
290  $\mu$ g/mL), (Fig. 5C). In the presence of 8% (v/v) [EMIM][OAc], inhibition of fluconazole became  
291 more significant. Remarkably, YICW001 could tolerate up to 25  $\mu$ g/mL fluconazole while this

292 concentration proved lethal for the wildtype (Fig. 5C). Taken together, the mutant in IL increased  
293 gene expression, better tolerated enzymatic inhibition of the steroid biosynthesis pathway, and  
294 elevated the end-product (i.e., ergosterol) biosynthesis in comparison to the wildtype.

295

## 296 **Discussion**

297 Microbial biocatalysis in ILs is novel for biosynthesis of fuels and chemicals. For instance,  
298 the imidazolium-based ILs (e.g., [EMIM][OAc]) are effective for reducing lignocellulosic biomass  
299 recalcitrance (59) to be used for downstream fermentation but greatly inhibit microbial growth  
300 even at low concentrations (47, 60). This incompatibility presents a significant barrier for novel  
301 microbial biocatalysis in ILs. While mechanisms of IL-toxicity have been proposed (22, 29, 31),  
302 the complete picture is unclear of how cells resist to ILs and whether these cells can adapt to  
303 achieve IL-tolerance for industrial compatibility (19, 20, 27). To illuminate the mechanisms of IL  
304 toxicity and enhanced tolerance (Fig. 6), we characterized naturally IL-tolerant *Y. lipolytica* and  
305 its superior evolved mutant, YICW001, generated by ALE (Fig. 2A).

306 Imidazolium-based ILs inhibit the cell by inserting their alkyl chains into the hydrophobic  
307 core of the plasma membrane (Fig. 6B, 6E, 6C, and 6F) (41, 48). ILs with longer alkyl chains  
308 become more lipophilic (21, 61) and cause greater disruption of the membrane as supported by  
309 growth rates in various ILs ([BMIM]  $\gg$  [AMIM]  $\sim$  [EMIM]) (Fig. 2D, 2E). The conjoint anion  
310 likely re-associates with the cation imbedded into the membrane causing greater membrane  
311 disturbance (48). The tendency of an anion to interact with the cation intensifies with increasing  
312 basicity, which increases IL toxicity as demonstrated by reduced growth rates in various ILs  
313 ([OAc]  $\gg$  [Br]  $\sim$  [Cl]) (Fig. 2D, 2E).

314 Consequences of IL membrane disruption increase membrane fluidity (e.g., ionic  
315 surfactant) (23, 49) and impose lateral pressure on the membrane (50, 62) as evidenced by cavities,  
316 dents, and wrinkles in SEM images (Fig. 3C, 3E, 3G) and dramatic remodeling of lipids in *Y.*  
317 *lipolytica* (Fig. 4). In addition, harmful interactions between the IL and membrane result in a  
318 cascade of detrimental effects on cellular processes including DNA damage, enzyme inactivation,  
319 and protein degeneration (59, 63-65), as observed by reduced sterol and chitin contents (Fig. 5D  
320 and SI Appendix, Fig. S2) and perturbation of intracellular metabolism (Fig. 3I) of IL-exposed  
321 wildtype and YICW001 strains.

322 Wildtype and YICW001 strains combatted IL toxicity in part by rewiring membrane  
323 compositions to reduce membrane permeability and bilayer buckling pressure (imposed by ILs)  
324 (66, 67). Both strains overproduced all glycerophospholipid species except PE (Fig. 4F), which is  
325 vulnerable to lateral pressure (68, 69). In contrast to the wildtype, YICW001 is more robust  
326 because it adapts to produce more sterols, e.g., ergosterol upon IL-exposure (Fig. 5D), that function  
327 to maintain membrane fluidity and stability (55). This novel phenotype is evidenced by a  
328 significant upregulation of sterol biosynthesis genes (Fig. 5B) and improved enzymatic-tolerance  
329 to steroid-inhibiting drug, fluconazole (Fig. 5C) (58, 70). The result is also consistent with  
330 molecular simulations demonstrating sterols impede IL cations from inserting into artificial  
331 membranes (71-73).

332 Taken together, ILs inhibit cell growth by fluidizing the membrane and inflicting lateral  
333 pressures that destroy cellular homeostasis (Fig. 6B, 6C). Our research provides strong evidence  
334 of how intracellular processes of *Y. lipolytica* are rewired to remodel cell membranes upon IL-  
335 exposure. Comprehensive metabolic, transcriptomic, and enzymatic analyses provide strong  
336 evidence that sterols (i.e., ergosterol) are critical membrane components conferring IL-tolerance



337 in *Y. lipolytica* and enhanced IL-robustness in YICW001, functioning to impede cation insertion  
338 and maintain membrane homeostasis (72) (Fig. 6E, 6F). Although in this study we focused on  
339 elucidating IL-responsive metabolism specific to lipid membrane remodeling, future work will  
340 aim to determine the evolved genotype of YICW001 to further understand IL-tolerance in *Y.*  
341 *lipolytica* towards the application of reverse engineering IL-robustness in diverse, industrially-  
342 relevant microorganisms.

343

## 344 **Materials and Methods**

### 345 **Strains**

346 *Yarrowia lipolytica* (ATCC MYA-2613), a thiamine, leucine, and uracil auxotroph, was purchased  
347 from American Type Culture Collection. The evolved strain YICW001 was isolated after 200  
348 generations in gradually increased concentrations of [EMIM][OAc] up to 18% (v/v).

### 349 **Medium and culturing conditions**

350 *Growth medium.* ALE, irreversibility testing, and broad IL tolerance studies were conducted in  
351 defined media containing 6.7 g/L of yeast nitrogen base without amino acids (cat# Y0626, Sigma-  
352 Aldrich, MO, USA), 10 g/L of glucose, 100 mg/L of ampicillin, 50 mg/L of kanamycin, 30 mg/L  
353 of chloramphenicol, and various concentrations of ILs. Leucine (cat# 172130250, Acros Organics,  
354 CA, USA) and uracil (cat# 157301000, Acros Organics, CA, USA) were added to the media at  
355 concentrations of 190 mg/L and 20 mg/L, respectively.

356 For all other growth studies, 380 mg/L of leucine and 76 mg/L uracil were used. All ILs,  
357 including 1-ethyl-3-methylimidazolium acetate [EMIM][OAc] (>95 % purity), 1-ethyl-3-  
358 methylimidazolium chloride [EMIM][Cl] (>98% purity), 1-ethyl-3-methylimidazolium bromide  
359 [EMIM][Br] (99% purity), 1-allyl-3-methylimidazolium chloride [AMIM][Cl] (>98% purity), 1-

360 butyl-3-methylimidazolium acetate [BMIM][OAc] (>98% purity), 1-butyl-3-methylimidazolium  
361 chloride [BMIM][Cl] (99% purity), and 1-butyl-3-methylimidazolium bromide [BMIM][Br] (99%  
362 purity), were purchased from the Ionic Liquids Technologies Inc. (IoLiTec, AL, USA). Unless  
363 specifically mentioned, all experiments were performed with biological triplicates.

364 *Adaptive laboratory evolution.* ALE experiment was performed by serial dilution of *Y.*  
365 *lipolytica* in sequentially increasing concentrations of [EMIM][OAc] in 6-well plates with 3 mL  
366 working volume using an incubating microplate shaker (cat# 02-217-757, Fisher Scientific, PA,  
367 USA) at 28°C and 350 rpm with adhesive, breathable seals to prevent cross contamination (cat#  
368 50-550-304, Fisher Scientific, PA, USA). For each serial dilution, the top performing triplicate  
369 was transferred during mid-exponential growth phase into fresh medium at an initial optical  
370 density (OD) at 600 nm of 0.2. Increasing concentrations of [EMIM][OAc] were selected to  
371 achieve a specific growth rate  $\geq 0.02$  1/h. The maximum specific growth rates of all three technical  
372 replicates were calculated for each serial dilution using a minimum of three time points per  
373 replicate. After 200 generations of ALE, the top performing replicate culture was spread onto a  
374 petri plate containing defined medium with 10 g/L glucose and 20 g/L agar. The plate was  
375 incubated at 28°C for 36-48 hours. Single colonies were isolated and individually streaked onto  
376 fresh petri plates. This process was repeated once more to ensure isolation of purified colonies.  
377 Purified colonies (from three iterations of plate dilutions) were individually tested in the same  
378 growth conditions and [EMIM][OAc] concentration at which the evolved strain was originally  
379 collected to determine irreversibility. Individual cultures (from purified colonies) were collected  
380 and stored in glycerol at -80°C before streaking onto fresh petri plates, repeating three plate  
381 isolations, and retesting the irreversibility of the purified colonies to determine stability of  
382 YICW001.

### 383 **Analytical methods**

384 *Metabolomics.* Three biological replicates of the wildtype and YICW001 were grown in  
385 media containing 0% or 8% (v/v) [EMIM][OAc] and collected at the late-exponential growth  
386 phase for metabolomics analysis. Samples were immediately quenched in liquid nitrogen and  
387 stored at -80°C prior to extraction. Metabolites were extracted from a minimum of  $1 \times 10^7$  cells in  
388 400µL of the extraction solvent by incubating at -20°C for 20 min (74). The extraction solvent  
389 consists of 40:40:20 methanol:acetonitrile:water containing 0.1M formic acid. The soluble  
390 fraction was separated by centrifugation at 13,700 x g, 4°C for 5 minutes. To ensure complete  
391 extraction of cellular metabolites, we repeated extraction 3 times per sample. A total of 1.2 mL of  
392 solvent-soluble metabolite samples were subjected to drying under a stream of nitrogen at 4°C  
393 overnight to evaporate solvent. Lyophilized metabolites were reconstituted in 300µL of sterile  
394 water and analyzed by liquid chromatography mass spectrometer (LC-MS).

395 Metabolites were analyzed with an Exactive Plus orbitrap mass spectrometer (Thermo  
396 Scientific, San Jose, CA) equipped with Synergi 2.5µm Hydro-RP 100 (100 x 2.00 mm,  
397 Phenomenex, Torrance, CA, USA) set to 25°C. The LC-MS method analyzed in full scan negative  
398 ionization mode with an electrospray ionization source as previously described (75).

399 *Lipidomics.* Late-exponentially growing wildtype and YICW001 cells cultured in 0% and  
400 8% (v/v) [EMIM][OAc] were used for lipidomics study. Samples were immediately quenched in  
401 liquid nitrogen and stored at -80°C. After thawing on ice, samples were centrifuged for 3 minutes  
402 at max speed, 4°C before removing supernatant. Next, cell pellets were re-suspended in 800uL of  
403 0.1N hydrochloric acid:methanol 1:1 with 400uL of chloroform and disrupted with glass beads  
404 using a mini bead beater for 5 minute intervals until > 95% of cells were visually disrupted.  
405 Disrupted cells were vortexed and centrifuged at 4°C for 5 minutes before extracting the organic

406 phase into glass vials. Finally, samples were dried under a stream of nitrogen overnight at 4°C  
407 and reconstituted in 300uL of 9:1 methanol:chloroform before transferring into auto-sampler vials.  
408 Lipid extracts were analyzed in positive and negative ionization modes with an Exactive Plus  
409 orbitrap mass spectrometer (Thermo Fisher Scientific, San Jose, CA) equipped with an  
410 electrospray ionization probe and a Kinetex HILIC column (150 mm x 2.1 mm, 2.5 μm)  
411 (Phenomenex, Torrance, CA, USA) as previously described (76) except that lipid features were  
412 verified with external standards instead of fragments.

413 *Untargeted LCMS analysis.* Metabolomics and lipidomics raw files created by Xcalibur  
414 were imported into XCMS online and analyzed in pairwise jobs against the control data set,  
415 wildtype in 0% IL (77). XCMS resulting metabolic features were exported and features with  
416 intensity fold changes < 2 were removed. These pairwise sets of ‘perturbed’ metabolic features  
417 were analyzed with metaboanalyst (78) using ‘MS peaks to pathways’ tool with significant feature  
418 *P*-value cutoff = 0.05. This tool uses mummichog which algorithmically utilizes known metabolic  
419 pathways and networks to predict metabolites and pathways without prior identification of  
420 metabolites (79). The resulting pathway files from ‘perturbed’ pairwise feature sets were exported  
421 and pathways with less than two significant features (i.e., metabolite features with *P*-values < 0.05)  
422 were removed. Next, we filtered the pathways by defining a new parameter, pathway significance  
423 factor (psf) (equation 1), to account for i) total number of metabolites in the pathway (*p*<sub>size</sub>), ii)  
424 total identified metabolite features (*p*<sub>features</sub>), and iii) total number of significant metabolite features  
425 (*p*<sub>significant</sub>) identified for each pathway.

$$426 \quad \text{psf} = \frac{1}{\text{psf}_{\text{max}}} \times \frac{\text{p}_{\text{features}}}{\text{p}_{\text{size}}} \times \text{p}_{\text{significant}}^{0.5} \quad (1)$$

427 In our analysis, we chose a psf cutoff value of 0.58 to illustrate the top 15% most significantly  
428 perturbed pathways identified from our untargeted LCMS analysis.

429            *Targeted LCMS analysis.* Lipidomics raw data files created by Xcalibur were converted  
430 to open source mzML format using the ProteoWizard software (80). MAVEN software (Princeton  
431 University) was applied to performed retention time correction for each sample and used to  
432 manually select known lipids based on retention time and mass (81, 82). Glycerophospholipid  
433 headgroup species were analyzed individually and extracted signal intensities were corrected by  
434 cell optical density. The corrected intensities for each head group class were summed to visualize  
435 changes for each glycerophospholipid on a macro scale.

436            *Fatty acid quantification.* Three biological replicates of wildtype and Y1CW001 cells were  
437 grown in 0% and 8% (v/v) [EMIM][OAc] until mid-late exponential phase and cell pellets were  
438 stored at -20°C. The equivalent cell mass of 2 OD<sub>600nm</sub> was washed once with 0.05 M sodium  
439 phosphate solution and incubated in 2:1 (v/v) chloroform:methanol solution overnight at 4°C. 200  
440 µL of chloroform was extracted and mild methanolysis was performed as previously described  
441 (83). Briefly, 1.5 mL of methanol, 0.3 mL of 8% methanolic HCL solution and 50 µL of 2 mg/mL  
442 pentadecanoic acid was added to ensure complete transesterification and incubated overnight at  
443 55°C. After cooling to room temperature, 1mL of hexane containing 0.005 mg/mL pentadecanoic  
444 acid ethyl ester as internal standard and 1mL of water was added prior to extracting 250 µL of  
445 hexane for GCMS detection of fatty acid methyl esters.

446            *Sterol quantification.* Three biological replicates of wildtype and Y1CW001 cells were  
447 grown in 0% and 8% (v/v) [EMIM][OAc] until mid-late exponential phase and cell pellets were  
448 stored at -20°C. Sterol quantification was performed with the equivalent cell mass of 5 OD<sub>600nm</sub>  
449 as previously described (84) using a HP-5MS 30 m x 0.25 mm i.d. x 0.25 µm column (Agilent  
450 Technologies, USA) for separation of sterols.

451 *Chitin determination.* The relative quantity of chitin was analyzed for the wildtype and  
452 YICW001 late-exponentially growing cells in medium containing 0%, 2%, 5%, 8% and 10% (v/v)  
453 [EMIM][OAc]. Cell pellets were washed twice with water before resuspending 1 OD<sub>600nm</sub> of cell  
454 mass in 1 mL of water containing 50 µg/mL calcofluor white (CFW) (cat #18909, Sigma-Aldrich),  
455 which binds specifically to chitin (85, 86). Samples were incubated at room temperature for 15  
456 minutes at 650 rpms in a thermomixer (cat #5382000023, Eppendorf). Next, stained cells were  
457 washed twice with water to remove excess CFW prior to fluorescence (excitation: 360/40nm,  
458 emission: 460/40nm) and absorbance (OD<sub>600nm</sub>) measurements. Results were calculated by  
459 normalizing fluorescence intensity by respective sample OD values. Chitin determination  
460 experiments were conducted at least twice for each biological condition in technical replicates per  
461 experiment (wildtype 0%, n = 18; wildtype 2%, n = 6; wildtype 5%, n = 15; wildtype 8%, n = 12;  
462 YICW001 0%, n = 25; YICW001 2%, n = 6; YICW001 5%, n = 15; YICW001 8%, n = 29;  
463 YICW001 10%, n = 6).

464 *Scanning electron microscope (SEM).* Wildtype and YICW001 cells were inoculated at 1  
465 OD<sub>600nm</sub> in 0%, and 18% [EMIM][OAc] and 0.3M and 0.6M [BMIM][OAc] in 6-well microtiter  
466 plates using an incubating microplate shaker at 28°C and 350 rpm. After 24 hours, cells were  
467 collected, immediately washed once with water and incubated in 2% glutaraldehyde containing 10  
468 mM sodium phosphate buffer overnight at 4°C. Fixed samples were washed 3 times with water  
469 before post-fixing in 2% osmium tetroxide for 1 hour at room temperature. The cell pellets were  
470 placed on silicon chips and dehydrated with successive ethanol baths (50%, 60%, 70%, 80%, 90%,  
471 100%) for 15 minutes each. Finally, the dehydrated samples were dried using critical point drying  
472 in carbon dioxide at 1100 psi and 32°C before SEM imaging with Zeiss Argula using SEM2  
473 detector.

474 *RNA-sequencing of steroid biosynthesis pathway.* In order to investigate response of sterol  
475 biosynthesis genes in response to IL, we quantified expression level of the 14 steroid genes  
476 annotated in the KEGG database (87) using RNA-sequencing. Three biological replicates of  
477 wildtype and YICW001 were harvested at the mid-exponential growth phase from 0% and 8%  
478 (v/v) [EMIM][OAc] and immediately quenched in liquid nitrogen before storing samples at -80°C.  
479 Total RNA was purified using a Qiagen RNeasy mini kit (Cat no. 74104, Qiagen Inc, CA, USA).  
480 Filtered RNA-sequencing reads were imported and analyzed within the CLC genomics workbench  
481 version 11.0.1 (<https://www.qiagenbioinformatics.com/>) which was also used to calculate  
482 differential expression of steroid biosynthesis genes against the wildtype in 0% IL.

483 *Fluconazole treatment to investigate importance of sterol biosynthesis for enhanced IL*  
484 *tolerance.* To investigate correlation of sterol biosynthesis with enhancement of IL tolerance, we  
485 compared growth of the wildtype and YICW001 in media containing 0% or 8% (v/v)  
486 [EMIM][OAc] and various concentrations of fluconazole (cat# TCF0677, VWR) which inhibits  
487 fungal cytochrome P450 enzyme 14 $\alpha$ -demethylase (Ster4, Fig. 5A) required for sterol biosynthesis  
488 (58). First, we cultured the wildtype and YICW001 in media without IL until the mid-exponential  
489 phase. Then, cells were washed by water and resuspended in the fresh media containing 0, 10, 25,  
490 50, 100, and 250  $\mu$ g/mL fluconazole. Finally, the same conditions were tested with addition of  
491 8% (v/v) [EMIM][OAc] to observe the requirement of sterol incorporation into the plasma  
492 membrane for IL tolerance. Results were obtained by calculating maximum specific growth rates  
493 for each biological condition. Sterol validation by fluconazole treatment experiments were  
494 conducted twice for each biological condition with sacrificial, technical replicates using 96-well  
495 microtiter plates and Duetz sandwich cover (cat # SMCR1296, Kuhner) incubated at 28°C and 400  
496 rpms.

497           *Statistics.* Statistical analysis was performed with SigmaPlot v.14 software using one-way  
498 analysis of variance (ANOVA) with Holm-Sidak correction or Student's t-test between  
499 biologically relevant conditions where noted.

500

## 501 **Acknowledgement**

502           This research is funded by the National Science Foundation (NSF CBET#1511881). We  
503 would like to thank Dr. Stephen Dearth (Biological and Small Molecule Mass Spectrometry Core,  
504 UTK) for assistance in metabolomics and lipidomics experiments, Dr. John Dunlap (Advanced  
505 Microscopy Imaging Center, UTK) for assistance in SEM experiments, and Mr. Piet Jones  
506 (Bredesen Center, UTK) for technical support. The RNAseq work conducted by the U.S.  
507 Department of Energy Joint Genome Institute, a DOE Office of Science User Facility, is supported  
508 by the Office of Science of the U.S. Department of Energy under Contract No. DE-AC02-  
509 05CH11231.



## 510 **References**

- 511 1. Ling H, Teo W, Chen B, Leong SSJ, & Chang MW (2014) Microbial tolerance engineering  
512 toward biochemical production: from lignocellulose to products. *Current Opinion in*  
513 *Biotechnology* 29:99-106.
- 514 2. Gong Z, Nielsen J, & Zhou YJ (2017) Engineering Robustness of Microbial Cell Factories.  
515 *Biotechnology Journal* 12(10):1700014.
- 516 3. Nicolaou SA, Gaida SM, & Papoutsakis ET (2010) A comparative view of metabolite and  
517 substrate stress and tolerance in microbial bioprocessing: From biofuels and chemicals, to  
518 biocatalysis and bioremediation. *Metabolic Engineering* 12(4):307-331.
- 519 4. Bokinsky G, *et al.* (2011) Synthesis of three advanced biofuels from ionic liquid-pretreated  
520 switchgrass using engineered *Escherichia coli*. *Proceedings of the National Academy of*  
521 *Sciences* 108(50):19949-19954.
- 522 5. Park JI, *et al.* (2012) A Thermophilic Ionic Liquid-Tolerant Cellulase Cocktail for the  
523 Production of Cellulosic Biofuels. *PLOS ONE* 7(5):e37010.
- 524 6. Chen H, *et al.* (2017) A review on the pretreatment of lignocellulose for high-value  
525 chemicals. *Fuel Processing Technology* 160:196-206.
- 526 7. Ryu S, Labbé N, & Trinh CT (2015) Simultaneous saccharification and fermentation of  
527 cellulose in ionic liquid for efficient production of  $\alpha$ -ketoglutaric acid by *Yarrowia*  
528 *lipolytica*. *Applied Microbiology and Biotechnology* 99(10):4237-4244.
- 529 8. van Rantwijk F & Sheldon RA (2007) Biocatalysis in Ionic Liquids. *Chemical Reviews*  
530 107(6):2757-2785.

- 531 9. Yoo CG, Pu Y, & Ragauskas AJ (2017) Ionic liquids: Promising green solvents for  
532 lignocellulosic biomass utilization. *Current Opinion in Green and Sustainable Chemistry*  
533 5:5-11.
- 534 10. Li C, *et al.* (2010) Comparison of dilute acid and ionic liquid pretreatment of switchgrass:  
535 Biomass recalcitrance, delignification and enzymatic saccharification. *Bioresource*  
536 *Technology* 101(13):4900-4906.
- 537 11. Mora-Pale M, Meli L, Doherty TV, Linhardt RJ, & Dordick JS (2011) Room temperature  
538 ionic liquids as emerging solvents for the pretreatment of lignocellulosic biomass.  
539 *Biotechnology and Bioengineering* 108(6):1229-1245.
- 540 12. Tadesse H & Luque R (2011) Advances on biomass pretreatment using ionic liquids: An  
541 overview. *Energy & Environmental Science* 4(10):3913-3929.
- 542 13. Socha AM, *et al.* (2014) Efficient biomass pretreatment using ionic liquids derived from  
543 lignin and hemicellulose. *Proc Natl Acad Sci U S A* 111(35):E3587-3595.
- 544 14. Cull SG, Holbrey JD, Vargas-Mora V, Seddon KR, & Lye GJ (2000) Room-temperature  
545 ionic liquids as replacements for organic solvents in multiphase bioprocess operations.  
546 *Biotechnology and Bioengineering* 69(2):227-233.
- 547 15. Passos H, Freire MG, & Coutinho JAP (2014) Ionic liquid solutions as extractive solvents  
548 for value-added compounds from biomass. *Green chemistry : an international journal and*  
549 *green chemistry resource : GC* 16(12):4786-4815.
- 550 16. Sendovski M, Nir N, & Fishman A (2010) Bioproduction of 2-Phenylethanol in a Biphasic  
551 Ionic Liquid Aqueous System. *Journal of Agricultural and Food Chemistry* 58(4):2260-  
552 2265.

- 553 17. Ventura SPM, *et al.* (2017) Ionic-Liquid-Mediated Extraction and Separation Processes for  
554 Bioactive Compounds: Past, Present, and Future Trends. *Chemical Reviews* 117(10):6984-  
555 7052.
- 556 18. Bauer G, Lima S, Chenevard J, Sugnaux M, & Fischer F (2017) Biodiesel via in Situ Wet  
557 Microalgae Biotransformation: Zwitter-Type Ionic Liquid Supported Extraction and  
558 Transesterification. *ACS Sustainable Chemistry & Engineering* 5(2):1931-1937.
- 559 19. Wu Y-W, *et al.* (2016) Ionic Liquids Impact the Bioenergy Feedstock-Degrading  
560 Microbiome and Transcription of Enzymes Relevant to Polysaccharide Hydrolysis.  
561 *mSystems* 1(6).
- 562 20. Sitepu IR, *et al.* (2014) Yeast tolerance to the ionic liquid 1-ethyl-3-methylimidazolium  
563 acetate. *FEMS Yeast Research* 14(8):1286-1294.
- 564 21. Yu M, *et al.* (2009) Effects of the 1-alkyl-3-methylimidazolium bromide ionic liquids on  
565 the antioxidant defense system of *Daphnia magna*. *Ecotoxicology and environmental*  
566 *safety* 72(6):1798-1804.
- 567 22. Docherty KM & Kulpa JCF (2005) Toxicity and antimicrobial activity of imidazolium and  
568 pyridinium ionic liquids. *Green Chemistry* 7(4):185-189.
- 569 23. Liu L-P, *et al.* (2016) Mechanistic insights into the effect of imidazolium ionic liquid on  
570 lipid production by *Geotrichum fermentans*. *Biotechnology for Biofuels* 9(1):266.
- 571 24. Konda NM, *et al.* (2014) Understanding cost drivers and economic potential of two variants  
572 of ionic liquid pretreatment for cellulosic biofuel production. *Biotechnology for Biofuels*  
573 7:86-86.
- 574 25. Lee S-M, Chang W-J, Choi A-R, & Koo Y-M (2005) Influence of ionic liquids on the  
575 growth of *Escherichia coli*. *Korean Journal of Chemical Engineering* 22(5):687-690.

- 576 26. Ouellet M, *et al.* (2011) Impact of ionic liquid pretreated plant biomass on *Saccharomyces*  
577 *cerevisiae* growth and biofuel production. *Green Chemistry* 13(10):2743-2749.
- 578 27. Frederix M, *et al.* (2016) Development of an *E. coli* strain for one-pot biofuel production  
579 from ionic liquid pretreated cellulose and switchgrass. *Green Chemistry* 18(15):4189-  
580 4197.
- 581 28. Khudyakov JI, *et al.* (2012) Global transcriptome response to ionic liquid by a tropical rain  
582 forest soil bacterium, *Enterobacter lignolyticus*. *Proceedings of the National Academy of*  
583 *Sciences of the United States of America* 109(32):E2173-E2182.
- 584 29. Ruegg TL, *et al.* (2014) An auto-inducible mechanism for ionic liquid resistance in  
585 microbial biofuel production. *Nature communications* 5:3490.
- 586 30. Mohamed ET, *et al.* (2017) Generation of a platform strain for ionic liquid tolerance using  
587 adaptive laboratory evolution. *Microbial Cell Factories* 16(1):204.
- 588 31. Dickinson Q, *et al.* (2016) Mechanism of imidazolium ionic liquids toxicity in  
589 *Saccharomyces cerevisiae* and rational engineering of a tolerant, xylose-fermenting strain.  
590 *Microbial Cell Factories* 15(1):1-13.
- 591 32. Blazeck J, *et al.* (2014) Harnessing *Yarrowia lipolytica* lipogenesis to create a platform for  
592 lipid and biofuel production. *Nature communications* 5:3131.
- 593 33. Xu P, Qiao K, Ahn WS, & Stephanopoulos G (2016) Engineering *Yarrowia lipolytica* as a  
594 platform for synthesis of drop-in transportation fuels and oleochemicals. *Proceedings of*  
595 *the National Academy of Sciences* 113(39):10848-10853.
- 596 34. Sitepu I, Selby T, Lin T, Zhu S, & Boundy-Mills K (2014) Carbon source utilization and  
597 inhibitor tolerance of 45 oleaginous yeast species. *Journal of Industrial Microbiology &*  
598 *Biotechnology* 41(7):1061-1070.

- 599 35. N Andreishcheva E, *et al.* (1999) *Adaptation to Salt Stress in a Salt-Tolerant Strain of the*  
600 *Yeast Yarrowia lipolytica* pp 1061-1067.
- 601 36. Biryukova EN, Medentsev AG, Arinbasarova AY, & Akimenko VK (2006) Tolerance of  
602 the yeast *Yarrowia lipolytica* to oxidative stress. *Microbiology* 75(3):243-247.
- 603 37. Yu C, Simmons BA, Singer SW, Thelen MP, & VanderGheynst JS (2016) Ionic liquid-  
604 tolerant microorganisms and microbial communities for lignocellulose conversion to  
605 bioproducts. *Applied Microbiology and Biotechnology*:1-13.
- 606 38. da Costa Lopes AM, João KG, Morais ARC, Bogel-Łukasik E, & Bogel-Łukasik R (2013)  
607 Ionic liquids as a tool for lignocellulosic biomass fractionation. *Sustainable Chemical*  
608 *Processes* 1(1):1.
- 609 39. Heckenbach ME, Romero FN, Green MD, & Halden RU (2016) Meta-analysis of ionic  
610 liquid literature and toxicology. *Chemosphere* 150:266-274.
- 611 40. Liu H, Zhang X, Chen C, Du S, & Dong Y (2015) Effects of imidazolium chloride ionic  
612 liquids and their toxicity to *Scenedesmus obliquus*. *Ecotoxicology and environmental*  
613 *safety* 122:83-90.
- 614 41. Lim GS, Jaenicke S, & Klahn M (2015) How the spontaneous insertion of amphiphilic  
615 imidazolium-based cations changes biological membranes: a molecular simulation study.  
616 *Physical chemistry chemical physics : PCCP* 17(43):29171-29183.
- 617 42. Mehmood N, *et al.* (2018) *Kluyveromyces marxianus*, an Attractive Yeast for Ethanolic  
618 Fermentation in the Presence of Imidazolium Ionic Liquids. *International Journal of*  
619 *Molecular Sciences* 19(3):887.

- 620 43. Lindberg L, Santos AXS, Riezman H, Olsson L, & Bettiga M (2013) Lipidomic Profiling  
621 of *Saccharomyces cerevisiae* and *Zygosaccharomyces bailii* Reveals Critical Changes in  
622 Lipid Composition in Response to Acetic Acid Stress. *PLOS ONE* 8(9):e73936.
- 623 44. Santos AXS & Riezman H (2012) Yeast as a model system for studying lipid homeostasis  
624 and function. *FEBS Letters* 586(18):2858-2867.
- 625 45. Lipke PN & Ovalle R (1998) Cell Wall Architecture in Yeast: New Structure and New  
626 Challenges. *Journal of Bacteriology* 180(15):3735-3740.
- 627 46. Ingram LO (1976) Adaptation of membrane lipids to alcohols. *Journal of Bacteriology*  
628 125(2):670-678.
- 629 47. Santos AG, Ribeiro BD, Alviano DS, & Coelho MAZ (2014) Toxicity of ionic liquids  
630 toward microorganisms interesting to the food industry. *RSC Advances* 4(70):37157-  
631 37163.
- 632 48. Yoo B, Shah JK, Zhu Y, & Maginn EJ (2014) Amphiphilic interactions of ionic liquids  
633 with lipid biomembranes: a molecular simulation study. *Soft Matter* 10(43):8641-8651.
- 634 49. Lee H (2015) Effects of imidazolium-based ionic surfactants on the size and dynamics of  
635 phosphatidylcholine bilayers with saturated and unsaturated chains. *Journal of Molecular*  
636 *Graphics and Modelling* 60:162-168.
- 637 50. Yoo B, Zhu Y, & Maginn EJ (2016) Molecular Mechanism of Ionic-Liquid-Induced  
638 Membrane Disruption: Morphological Changes to Bilayers, Multilayers, and Vesicles.  
639 *Langmuir* 32(21):5403-5411.
- 640 51. Wu Y, Sasaki T, Irie S, & Sakurai K (2008) A novel biomass-ionic liquid platform for the  
641 utilization of native chitin. *Polymer* 49(9):2321-2327.

- 642 52. Lesage G & Bussey H (2006) Cell Wall Assembly in *Saccharomyces cerevisiae*.  
643 *Microbiology and Molecular Biology Reviews* 70(2):317-343.
- 644 53. Ishmayana S, Kennedy UJ, & Learmonth RP (2017) Further investigation of relationships  
645 between membrane fluidity and ethanol tolerance in *Saccharomyces cerevisiae*. *World*  
646 *Journal of Microbiology and Biotechnology* 33(12):218.
- 647 54. Tan Z, Yoon JM, Nielsen DR, Shanks JV, & Jarboe LR (2016) Membrane engineering via  
648 trans unsaturated fatty acids production improves *Escherichia coli* robustness and  
649 production of biorenewables. *Metabolic Engineering* 35:105-113.
- 650 55. Kohlwein SD (2017) Analyzing and Understanding Lipids of Yeast: A Challenging  
651 Endeavor. *Cold Spring Harbor Protocols* 2017(5):pdb.top078956.
- 652 56. Caspeta L, *et al.* (2014) Altered sterol composition renders yeast thermotolerant. *Science*  
653 346(6205):75-78.
- 654 57. Vanegas Juan M, Contreras Maria F, Faller R, & Longo Marjorie L (2012) Role of  
655 Unsaturated Lipid and Ergosterol in Ethanol Tolerance of Model Yeast Biomembranes.  
656 *Biophysical Journal* 102(3):507-516.
- 657 58. de Souza W & Rodrigues JCF (2009) Sterol Biosynthesis Pathway as Target for Anti-  
658 trypanosomatid Drugs. *Interdisciplinary Perspectives on Infectious Diseases* 2009:19.
- 659 59. Fan L-L, Li H-J, & Chen Q-H (2014) Applications and Mechanisms of Ionic Liquids in  
660 Whole-Cell Biotransformation. *International Journal of Molecular Sciences* 15(7):12196-  
661 12216.
- 662 60. Mehmood N, *et al.* (2015) Impact of two ionic liquids, 1-ethyl-3-methylimidazolium  
663 acetate and 1-ethyl-3-methylimidazolium methylphosphonate, on *Saccharomyces*

- 664 *cerevisiae*: metabolic, physiologic, and morphological investigations. *Biotechnol Biofuels*  
665 8.
- 666 61. Galluzzi M, *et al.* (2013) Interaction of Imidazolium-Based Room-Temperature Ionic  
667 Liquids with DOPC Phospholipid Monolayers: Electrochemical Study. *Langmuir*  
668 29(22):6573-6581.
- 669 62. Yoo B, *et al.* (2016) Molecular mechanisms of ionic liquid cytotoxicity probed by an  
670 integrated experimental and computational approach. *Scientific Reports* 6:19889.
- 671 63. Stock F, *et al.* (2004) Effects of ionic liquids on the acetylcholinesterase - a structure-  
672 activity relationship consideration. *Green Chemistry* 6(6):286-290.
- 673 64. Auxenfans T, Husson E, & Sarazin C (2017) Simultaneous pretreatment and enzymatic  
674 saccharification of (ligno) celluloses in aqueous-ionic liquid media: A compromise.  
675 *Biochemical Engineering Journal* 117:77-86.
- 676 65. Nargotra P, Vaid S, & Bajaj B (2016) Cellulase Production from *Bacillus subtilis* SV1 and  
677 Its Application Potential for Saccharification of Ionic Liquid Pretreated Pine Needle  
678 Biomass under One Pot Consolidated Bioprocess. *Fermentation* 2(4):19.
- 679 66. Sandoval NR & Papoutsakis ET (2016) Engineering membrane and cell-wall programs for  
680 tolerance to toxic chemicals: beyond solo genes. *Current opinion in microbiology* 33:56-  
681 66.
- 682 67. Tan Z, *et al.* (2017) Engineering *Escherichia coli* membrane phospholipid head distribution  
683 improves tolerance and production of biorenewables. *Metabolic Engineering* 44:1-12.
- 684 68. de Kroon AIPM, Rijken PJ, & De Smet CH (2013) Checks and balances in membrane  
685 phospholipid class and acyl chain homeostasis, the yeast perspective. *Progress in lipid*  
686 *research* 52(4):374-394.



- 687 69. Renne MF & de Kroon AIPM (2018) The role of phospholipid molecular species in  
688 determining the physical properties of yeast membranes. *FEBS Letters* 592(8):1330-1345.
- 689 70. Yang Z, *et al.* (2017) Fluconazole inhibits the cellular ergosterol synthesis to confer  
690 synergism to berberine against yeast cells. *Journal of Global Antimicrobial Resistance*.
- 691 71. Cromie SRT, Del Pópolo MG, & Ballone P (2009) Interaction of Room Temperature Ionic  
692 Liquid Solutions with a Cholesterol Bilayer. *The Journal of Physical Chemistry B*  
693 113(34):11642-11648.
- 694 72. Russo G, Witos J, Rantamäki AH, & Wiedmer SK (2017) Cholesterol affects the  
695 interaction between an ionic liquid and phospholipid vesicles. A study by differential  
696 scanning calorimetry and nanoplasmonic sensing. *Biochimica et Biophysica Acta (BBA) -*  
697 *Biomembranes* 1859(12):2361-2372.
- 698 73. Klahn M & Zacharias M (2013) Transformations in plasma membranes of cancerous cells  
699 and resulting consequences for cation insertion studied with molecular dynamics. *Physical*  
700 *chemistry chemical physics : PCCP* 15(34):14427-14441.
- 701 74. Rabinowitz JD & Kimball E (2007) Acidic Acetonitrile for Cellular Metabolome  
702 Extraction from *Escherichia coli*. *Analytical Chemistry* 79(16):6167-6173.
- 703 75. Lu W, *et al.* (2010) Metabolomic Analysis via Reversed-Phase Ion-Pairing Liquid  
704 Chromatography Coupled to a Stand Alone Orbitrap Mass Spectrometer. *Analytical*  
705 *Chemistry* 82(8):3212-3221.
- 706 76. Cassilly CD, *et al.* (2017) Role of phosphatidylserine synthase in shaping the  
707 phospholipidome of *Candida albicans*. *FEMS Yeast Research* 17(2):fox007-fox007.

- 708 77. Tautenhahn R, Patti GJ, Rinehart D, & Siuzdak G (2012) XCMS Online: A Web-Based  
709 Platform to Process Untargeted Metabolomic Data. *Analytical Chemistry* 84(11):5035-  
710 5039.
- 711 78. Xia J & Wishart DS (2016) Using MetaboAnalyst 3.0 for Comprehensive Metabolomics  
712 Data Analysis. *Current Protocols in Bioinformatics* 55(1):14.10.11-14.10.91.
- 713 79. Li S, *et al.* (2013) Predicting Network Activity from High Throughput Metabolomics.  
714 *PLOS Computational Biology* 9(7):e1003123.
- 715 80. Martens L, *et al.* (2011) mzML—a Community Standard for Mass Spectrometry Data.  
716 *Molecular & Cellular Proteomics : MCP* 10(1):R110.000133.
- 717 81. Melamud E, Vastag L, & Rabinowitz JD (2010) Metabolomic Analysis and Visualization  
718 Engine for LC–MS Data. *Analytical Chemistry* 82(23):9818-9826.
- 719 82. Clasquin MF, Melamud E, & Rabinowitz JD (2002) LC-MS Data Processing with  
720 MAVEN: A Metabolomic Analysis and Visualization Engine. *Current Protocols in*  
721 *Bioinformatics*, (John Wiley & Sons, Inc.).
- 722 83. Ichihara Ki & Fukubayashi Y (2010) Preparation of fatty acid methyl esters for gas-liquid  
723 chromatography. *Journal of Lipid Research* 51(3):635-640.
- 724 84. Santivañez-Veliz M, *et al.* (2017) Development, validation and application of a GC–MS  
725 method for the simultaneous detection and quantification of neutral lipid species in  
726 *Trypanosoma cruzi*. *Journal of Chromatography B* 1061-1062:225-232.
- 727 85. Richard M, Quijano RR, Bezzate S, Bordon-Pallier F, & Gaillardin C (2001) Tagging  
728 Morphogenetic Genes by Insertional Mutagenesis in the Yeast *Yarrowia lipolytica*.  
729 *Journal of Bacteriology* 183(10):3098-3107.

- 730 86. Sheng W, Yamashita S, Ohta A, & Horiuchi H (2013) Functional Differentiation of Chitin  
731 Synthases in *Yarrowia lipolytica*. *Bioscience, Biotechnology, and Biochemistry*  
732 77(6):1275-1281.
- 733 87. Kanehisa M, Sato Y, Kawashima M, Furumichi M, & Tanabe M (2016) KEGG as a  
734 reference resource for gene and protein annotation. *Nucleic Acids Research* 44(D1):D457-  
735 D462.
- 736

737 **Figure legends**

738

739 **Fig 1.** Evolutionary engineering of IL-tolerant *Y. lipolytica* strains. **Step 1:** Adaptive laboratory  
740 evolution of *Y. lipolytica* on various concentrations of [EMIM][OAc]. **Step 2:** Single mutant  
741 isolation on plates without IL. **Step 3:** Mutant characterization to elucidate the underlying  
742 mechanism of solvent tolerance. `

743

744 **Fig 2. (A)** Adaptive laboratory evolution of *Y. lipolytica* grown with increasing concentrations of  
745 [EMIM][OAc]. **(B, C)** Irreversibility testing of the evolved *Y. lipolytica* strain YICW001 in various  
746 concentrations of [EMIM][OAc]. **(D, E)** Broad tolerance test for growth of *Y. lipolytica* wildtype  
747 and mutant at various concentrations of 0.6M and 1.09M ILs. Error bars represent the standard  
748 deviation of three independent biological replicates repeated twice (n=6). Abbreviations:  
749 [EMIM][OAc]: 1-ethyl-3-methylimidazolium acetate; [EMIM][Cl]: 1-ethyl-3-methylimidazolium  
750 chloride; [EMIM][Br]: 1-ethyl-3-methylimidazolium bromide acetate; [BMIM][OAc]: 1-butyl-3-  
751 methylimidazolium; [BMIM][Cl]: 1-butyl-3-methylimidazolium chloride; [BMIM][Br]: 1-butyl-  
752 3-methylimidazolium bromide; and [AMIM][Cl]: 1-allyl-3-methylimidazolium chloride.

753

754 **Fig. 3.** SEM imaging of the wildtype and YICW001 cells exposed to **(A, B)** no IL, **(C, D)** 18%  
755 (v/v) [EMIM][OAc], **(E, F)** 0.3M [BMIM][OAc], and **(G, H)** 0.6M [BMIM][OAc]. **(I)** IL-  
756 responsive pathways perturbed with respect to wildtype *Y. lipolytica* growing in medium without  
757 IL with a psf score > 0.58. Biological triplicates were performed for all biological conditions and  
758 results were combined from hydrophilic metabolomics extraction (negative ionization, n = 3), and  
759 hydrophobic lipidomics extractions (negative ionization, n = 3; positive ionization, n = 3).

760

761 **Fig. 4.** Glycerophospholipid and fatty acid reorganization in wildtype *Y. lipolytica* and YICW001  
762 in 0% and 8% (v/v) [EMIM][OAc]. (A) PC: Phosphatidylcholine (F = 11.038) (B) PI:  
763 phosphatidylinositol (F = 14.147); (C) PA: phosphatidic acid (F = 31.234); (D) PG: phosphatidyl  
764 glycerol (F = 29.562); (E) PS: phosphatidylserine (degree of freedom = 1; wildtype 8%, F =  
765 19.953; YICW001 0%, F = 104.891; YICW001 8%, F = 3.097); (F) PE: phosphatidylethanolamine  
766 (F = 26.321); (G) CL: cardiolipin (F = 8.157). (H) Fatty acid distributions (C16:1, F = 9.501;  
767 C16:0, F = 4.768; C18:2, F = 13.4; C18:1, F = 84.261; C18:0, F = 2.839). (I) Chemical structures  
768 of glycerophospholipid backbone and headgroup species. All error bars represent standard  
769 deviation of biological triplicates (n=3) and statistical significance was calculated using one-way  
770 analysis of variance (ANOVA) with Holm-Sidak correction against control group, wildtype in 0%  
771 IL (degrees of freedom, 3). Symbols: “\*”:  $p$ -value < 0.05; “\*\*”:  $p$ -value < 0.01; “\*\*\*”,  $p$ -values <  
772 0.001.

773

774 **Fig. 5.** (A) Steroid biosynthesis pathway in *Y. lipolytica*. Fluconazole is an antifungal drug that  
775 inhibits sterol 14-demethylase (Ster4) (B) Differential gene expression of the steroid pathway as  
776 compared to the wildtype strain in medium without IL (Ster1, YALI0A10076g; Ster2,  
777 YALI0E15730g; Ster3, YALI0F04378g; Ster4, YALI0B05126g; Ster5, YALI0B23298g; Ster6,  
778 YALI0F11297g; Ster7, YALI0C22165g; Ster8, YALI0B17644g; Ster9, YALI0F08701g; Ster10-  
779 1, YALI0E32065g; Ster10-2, YALI0B17204g; Ster11, YALI0D20878g; Ster12, YALI0A18062g;  
780 Ster13, YALI0D19206g). (C) Effect of fluconazole inhibiting the steroid pathway on cell growth.  
781 Error bars represent standard deviation from three technical replicates repeated twice per  
782 biological condition (n = 6) (D) Relative ergosterol content of wildtype and YICW001 strains in

783 0% and 8% (v/v) [EMIM][OAc]. Error bars represent standard deviation of biological triplicates  
784 (n =3) and statistical significance was calculated between the wildtype and YICW001 in 8% IL  
785 using the Student's t-test (t = -4.244 with 4 degrees of freedom). Abbreviation: "\*\*\*", p-value =  
786 0.013.

787

788 **Fig. 6.** Mechanisms of IL interference and tolerance in wildtype *Y. lipolytica* and YICW001. (**A**,  
789 **D**) No IL exposure. (**B**, **E**) IL exposure and interference. (**C**, **D**) Cellular membrane response.

790

791 **Fig. 1**

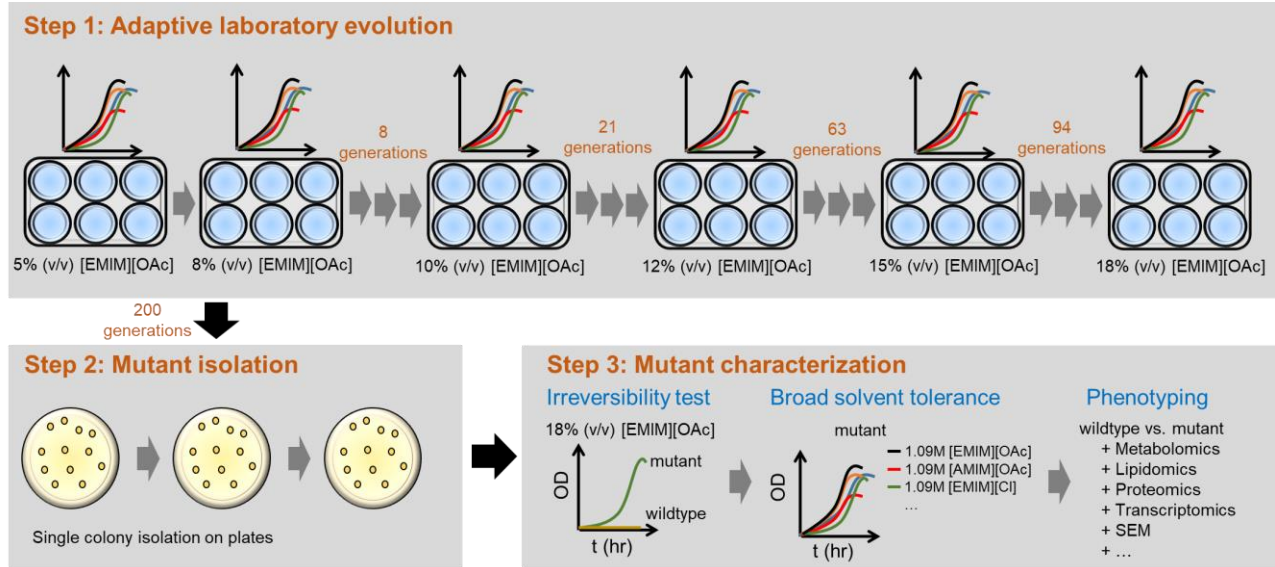

792

793

794

795

796

797

798

799

800

801 **Fig. 2**

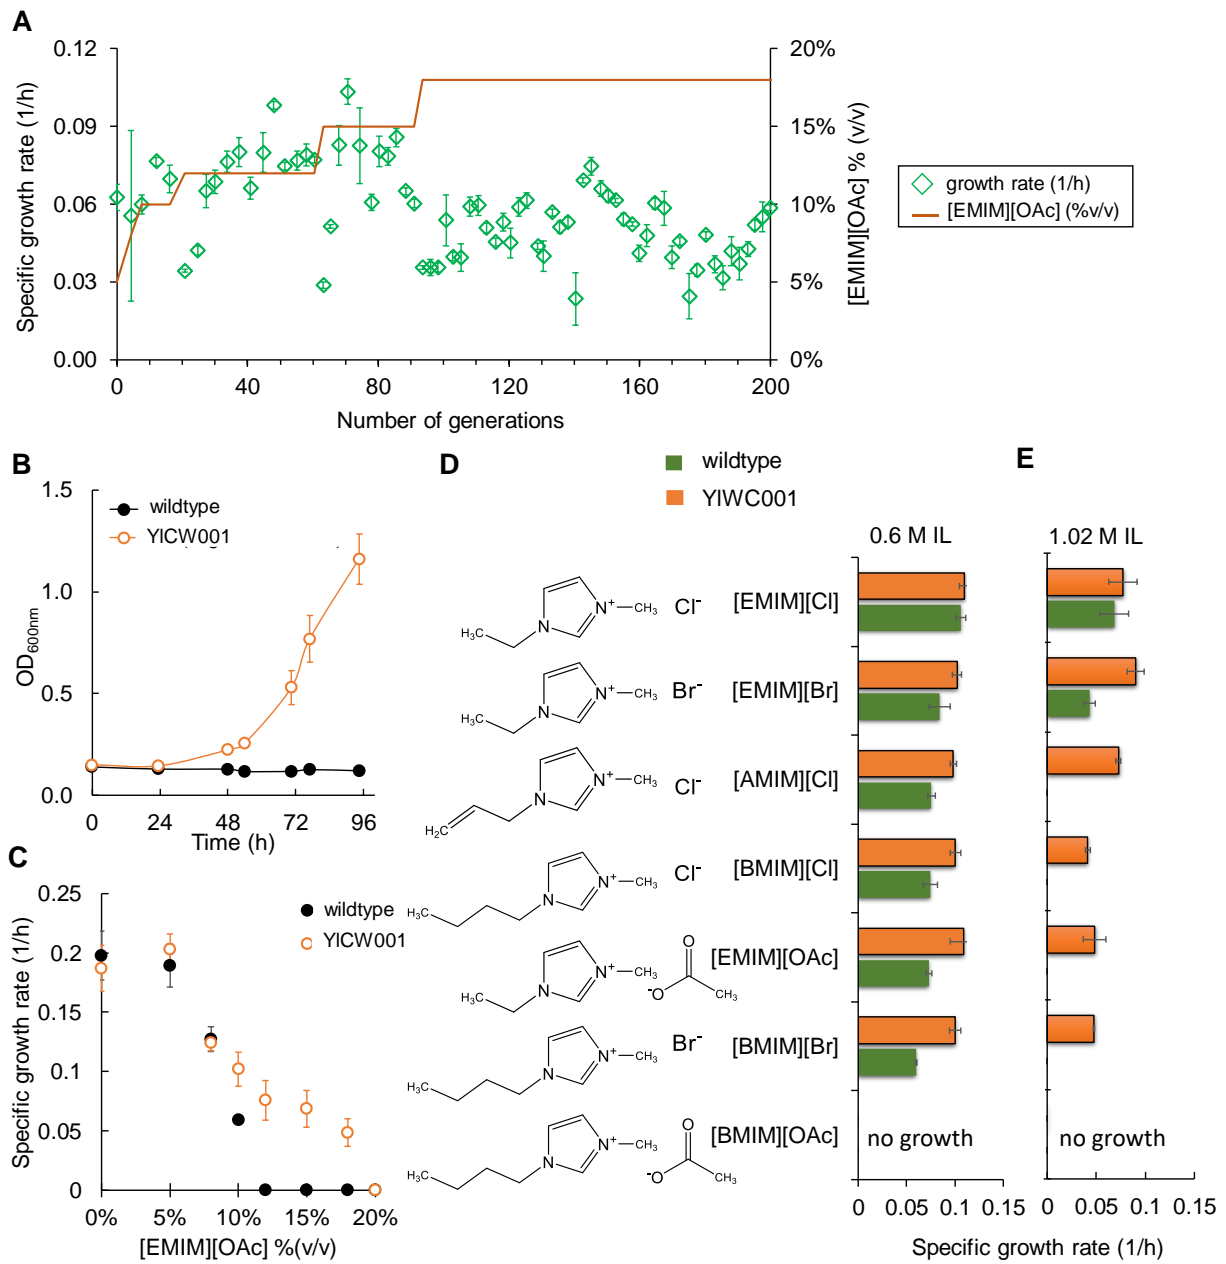

802

803



804 **Fig. 3**

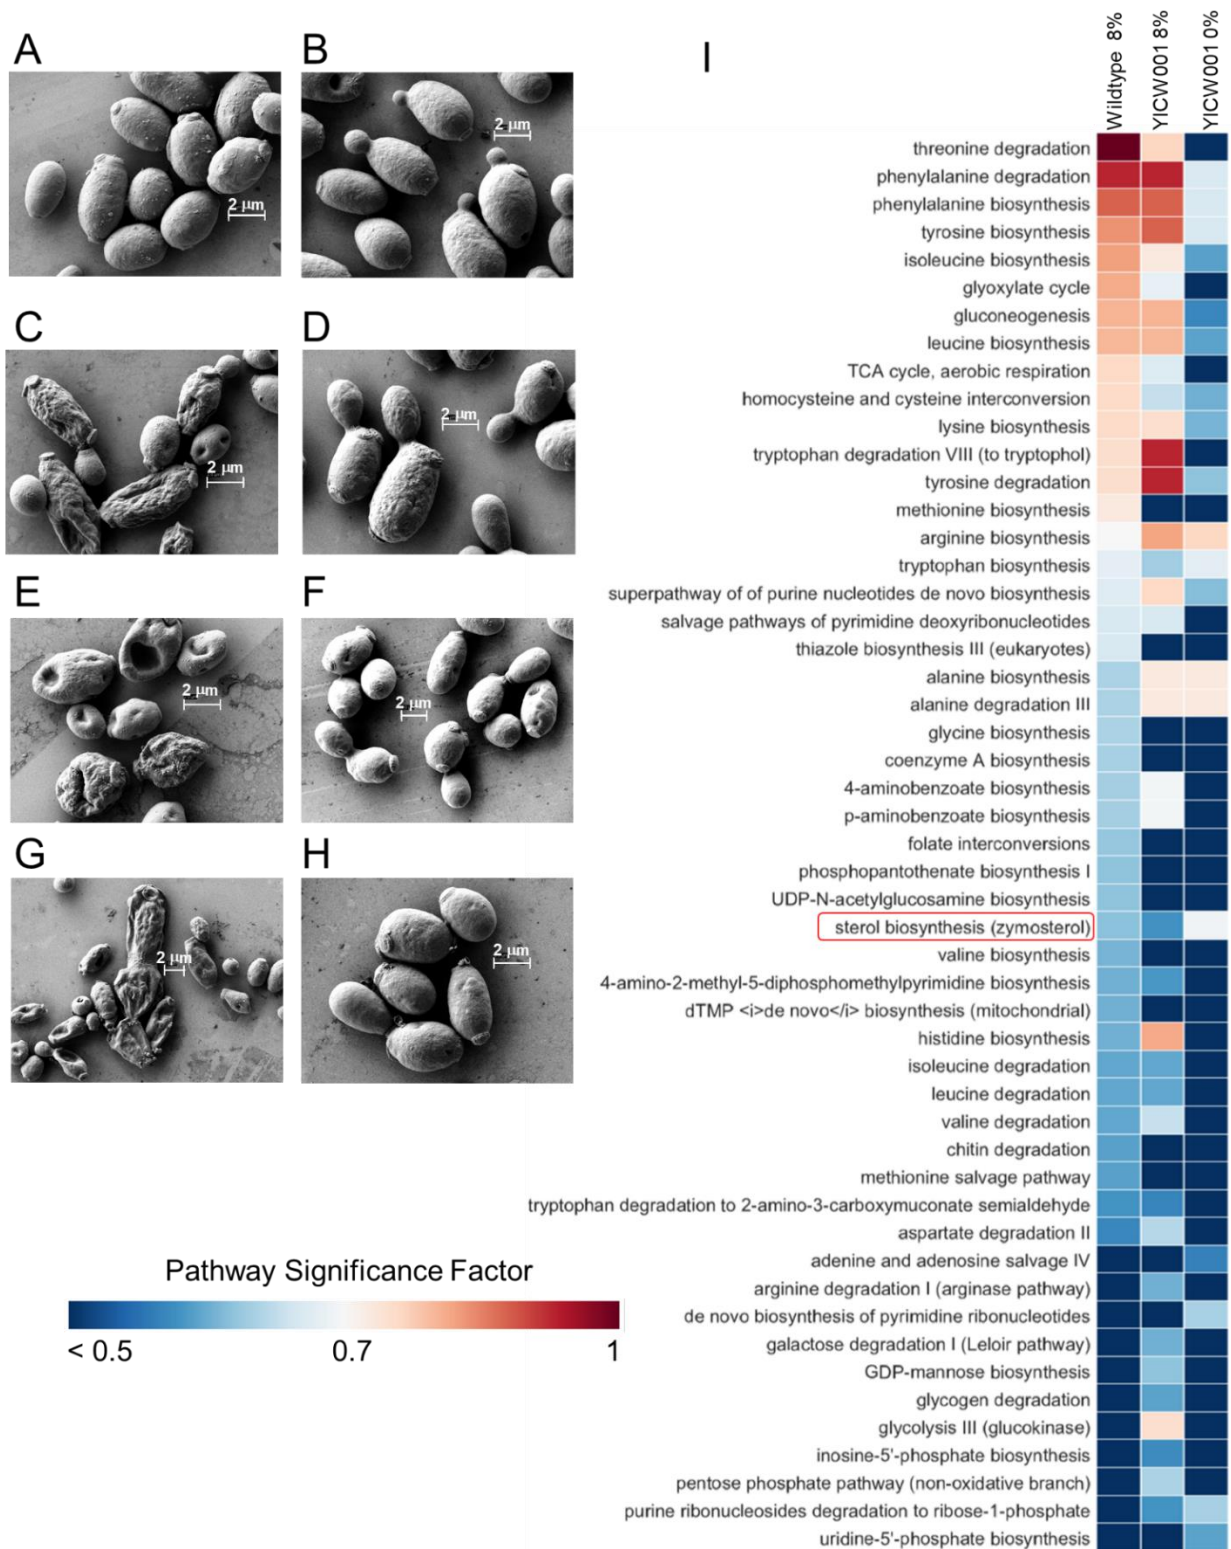

805

806

807 **Fig. 4**

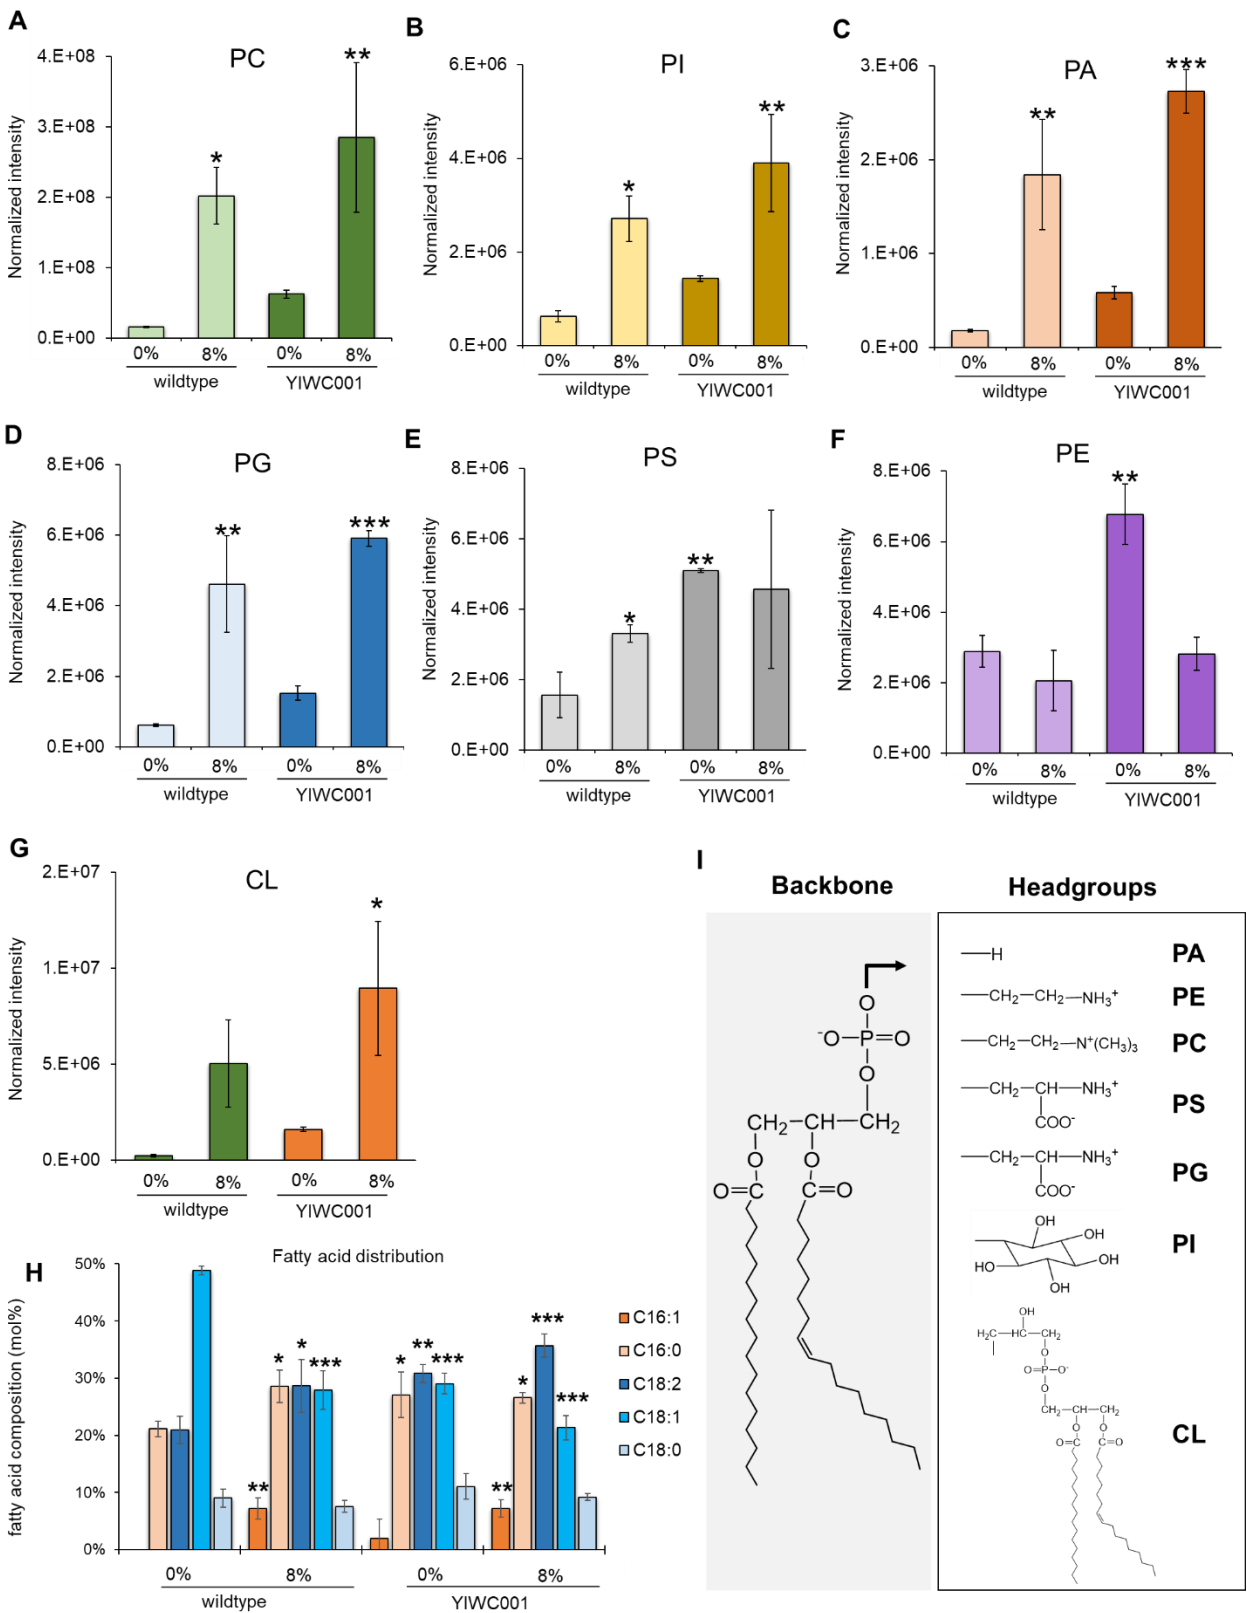

808

809 **Fig. 5**

810

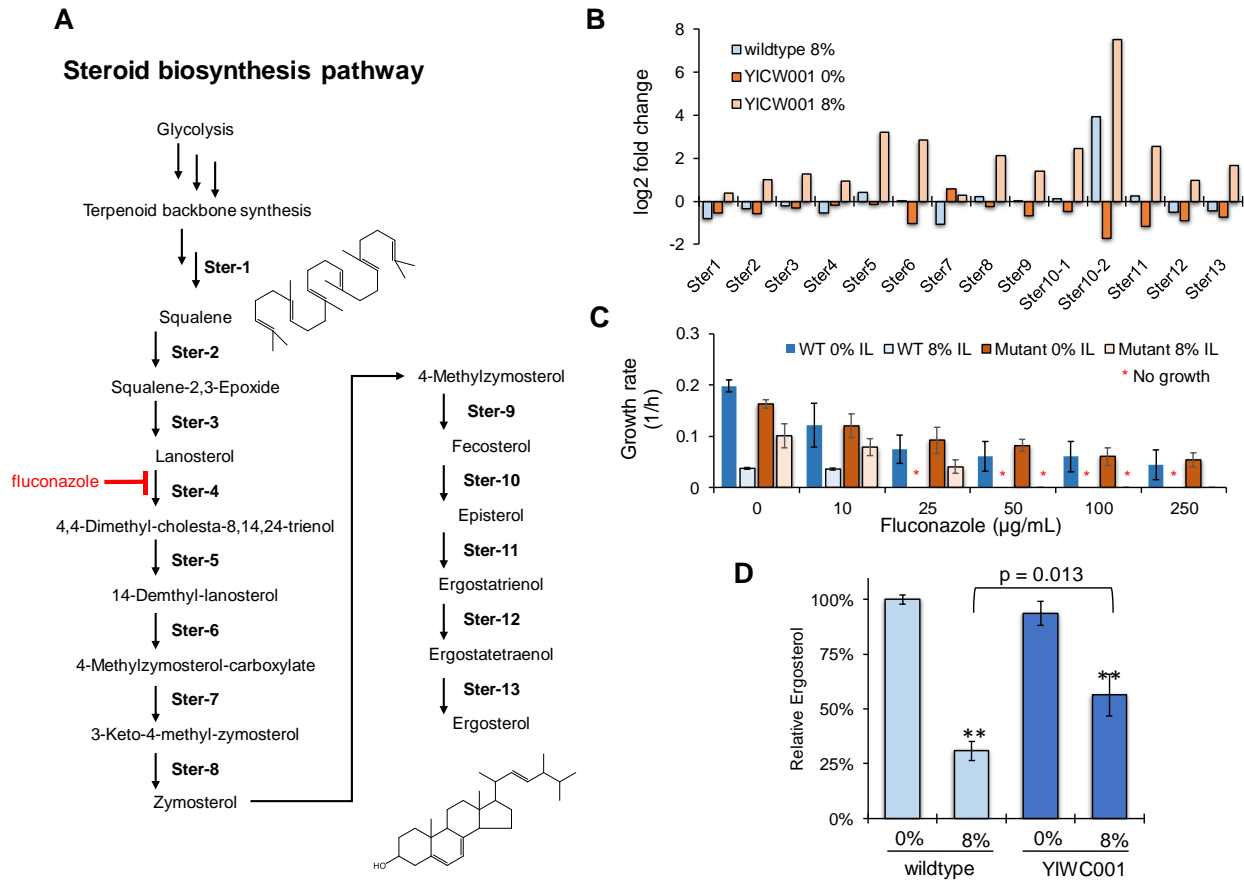

811

812

813 **Fig. 6**

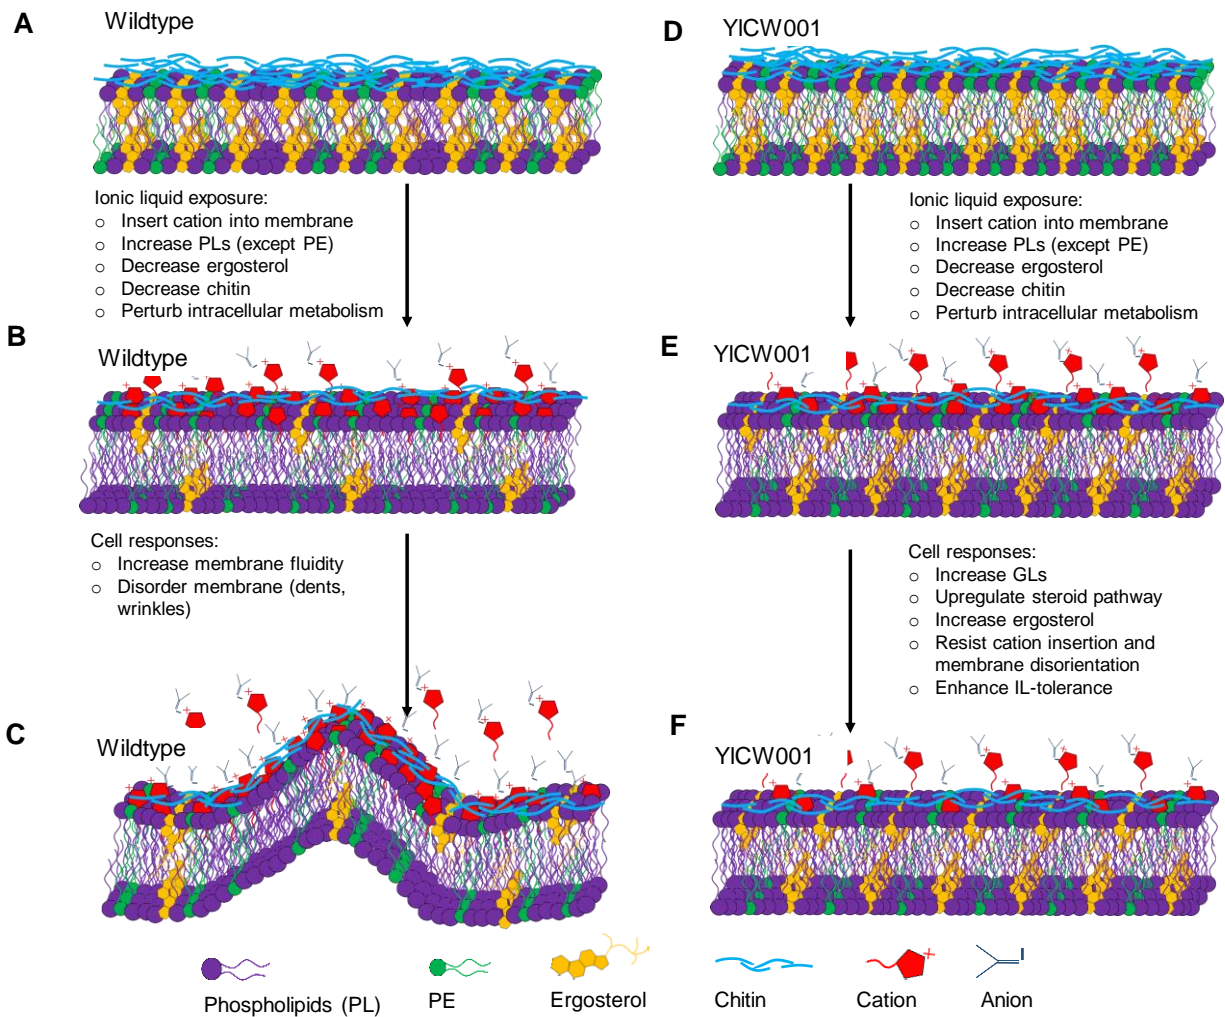

814

815
